# Supplementary material for: Improving solubility of fisetin by cocrystallization
Source: Royal Society of Chemistry journal article supplement (doi:10.1039/c4ce01713g), 2014-09-26
Supplement: c4ce01713g1.pdf [file c4ce01713g1.pdf]

## Electronic Supplementary Information

### Improving solubility of fisetin by cocrystalization

*Michał Sowa<sup>a</sup>, Katarzyna Ślepokura<sup>b</sup>, Ewa Matczak-Jon<sup>a</sup>*

<sup>a</sup>*Department of Chemistry, Wrocław University of Technology, Wybrzeże Wyspiańskiego 27, 50-370 Wrocław, Poland. Tel. (+4871) 320-41-34; Fax: (+4871) 320-43 60; E-mail: ewa.matczak-jon@pwr.wroc.pl*

<sup>b</sup>*Faculty of Chemistry, University of Wrocław, 14 F. Joliot-Curie Street, 50-383 Wrocław, Poland*

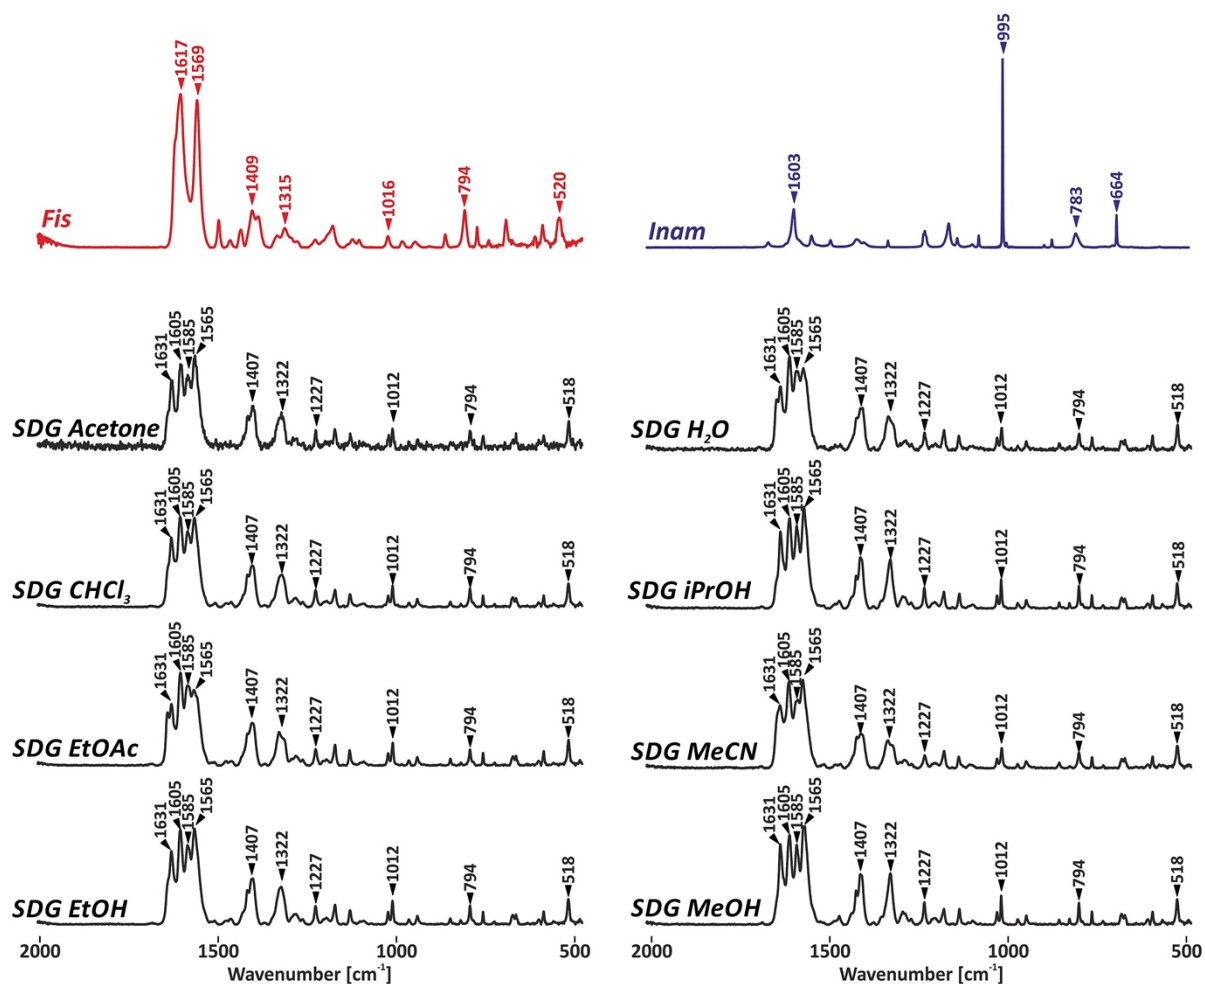

**Fig. S1** FT-Raman spectra of fisetin (Fis), isonicotinamide (Inam) and products of their co-grinding with addition of a solvent (SDG). Selected vibrational bands are indicated.

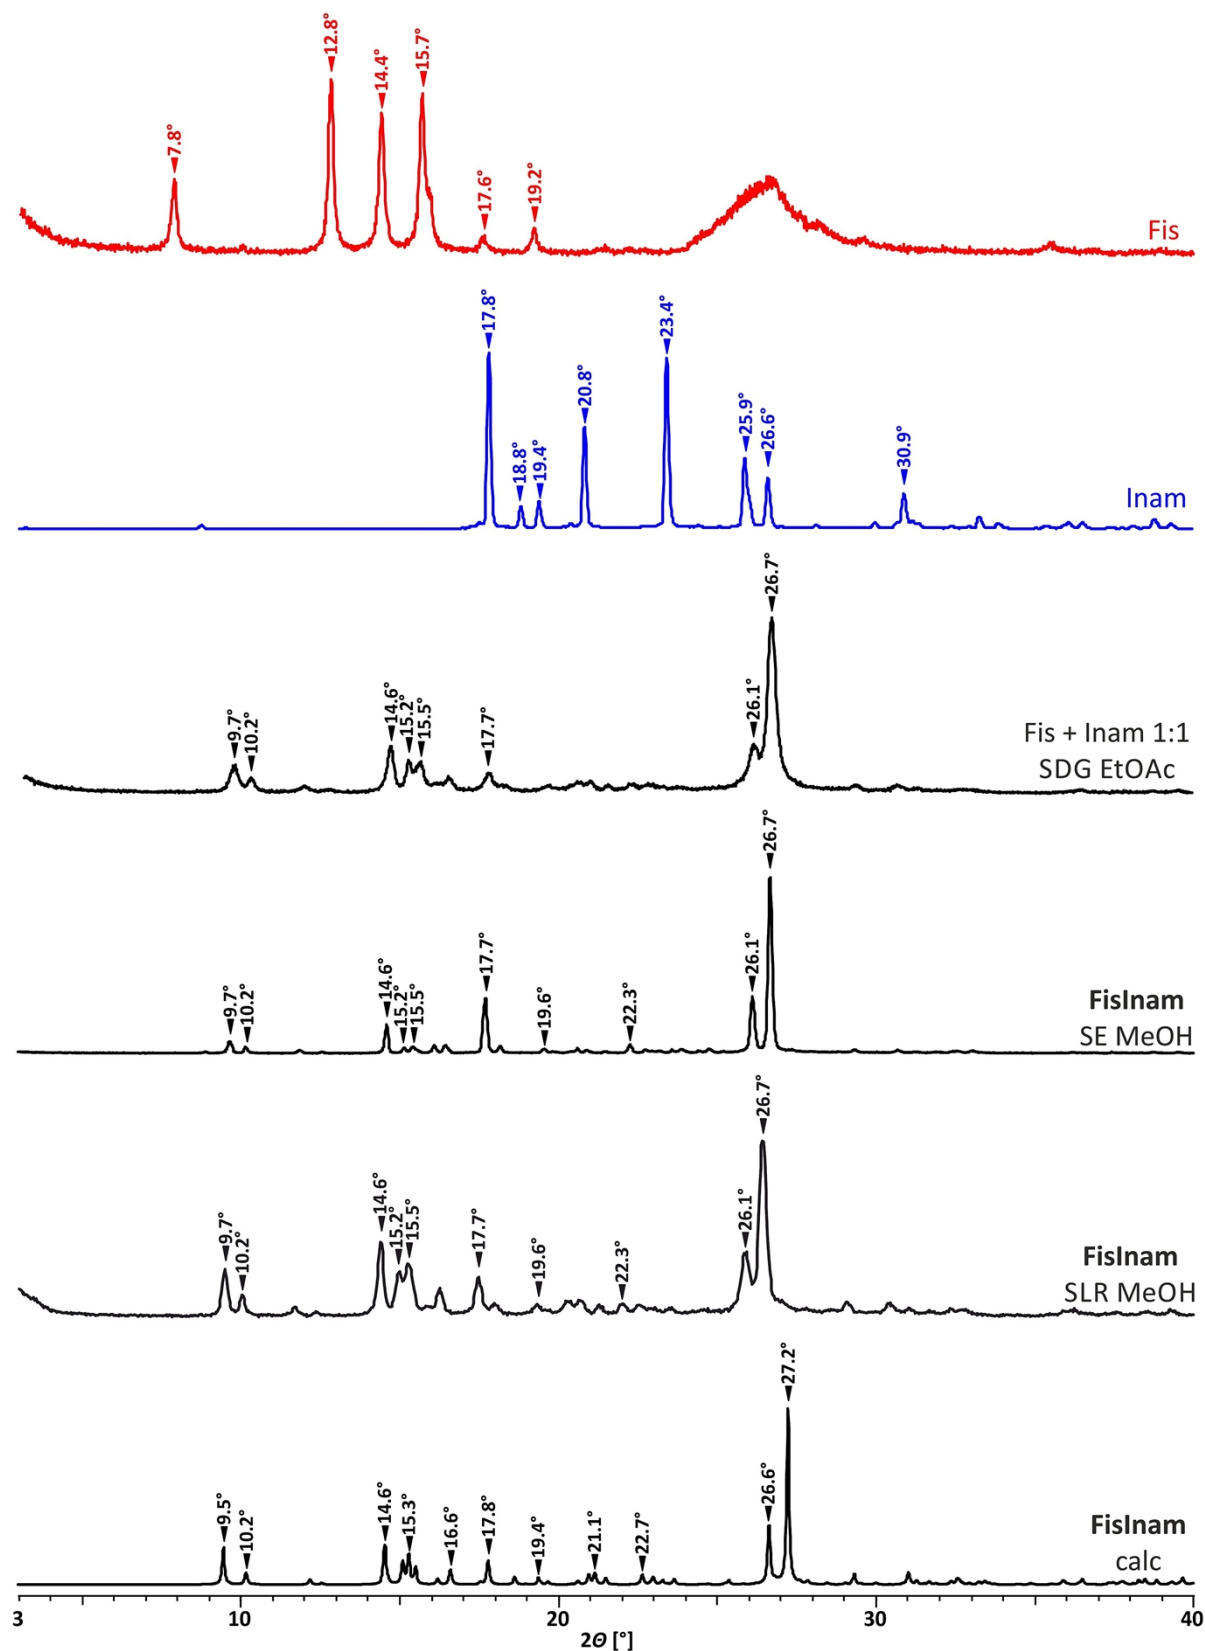

**Fig. S2** XRPD plots of fisetin (Fis), isonicotinamide (Inam), product of their co-grinding with addition of ethyl acetate (Fis + Inam 1:1 SDG EtOAc), and corresponding **FisInam** cocrystal: obtained by slow evaporation of a methanolic solution (**FisInam** SE MeOH), by slurry technique (**FisInam** SLR MeOH) and diffractogram calculated from the low-temperature refinement of FisInam (**FisInam** calc). Positions of selected reflections are indicated.

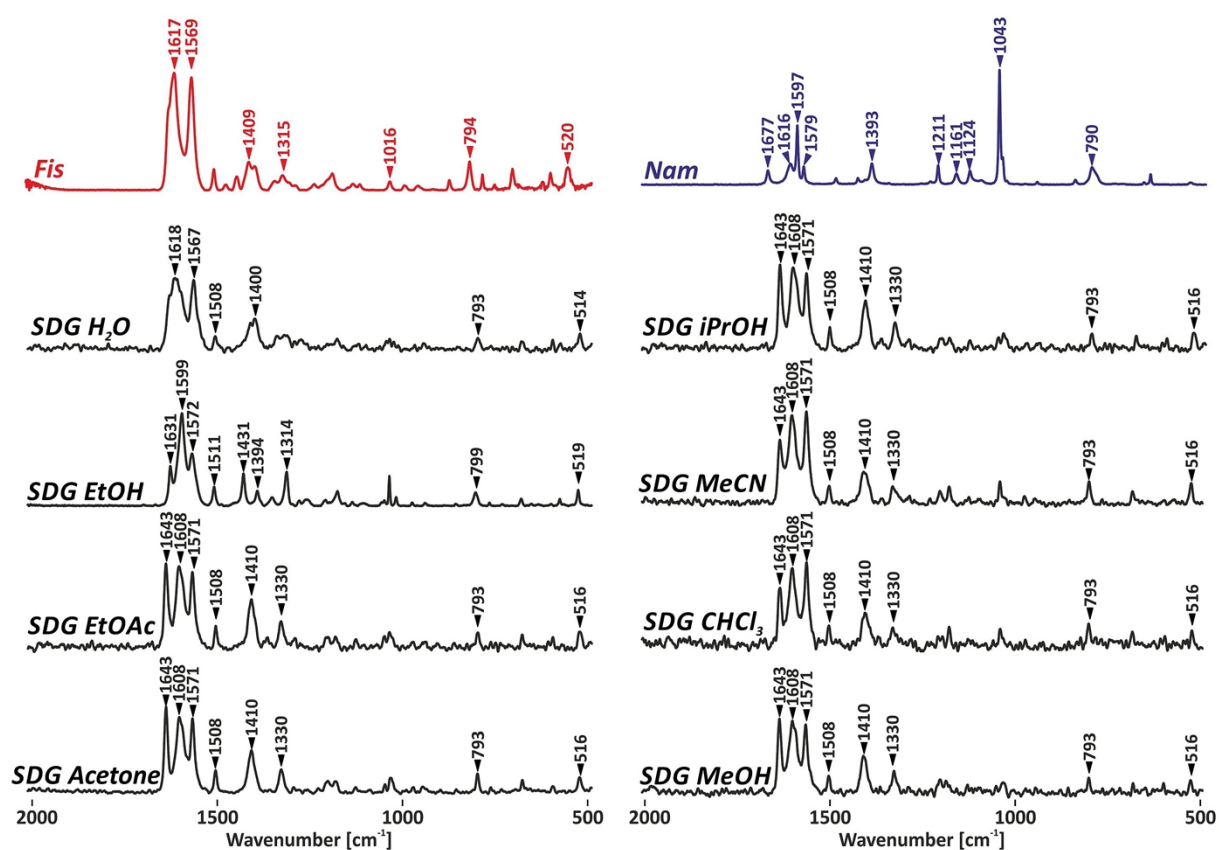

**Fig. S3** FT-Raman spectra of fisetin (Fis), nicotinamide (Nam) and products of their co-grinding with addition of a solvent (SDG). Selected vibrational bands are indicated.

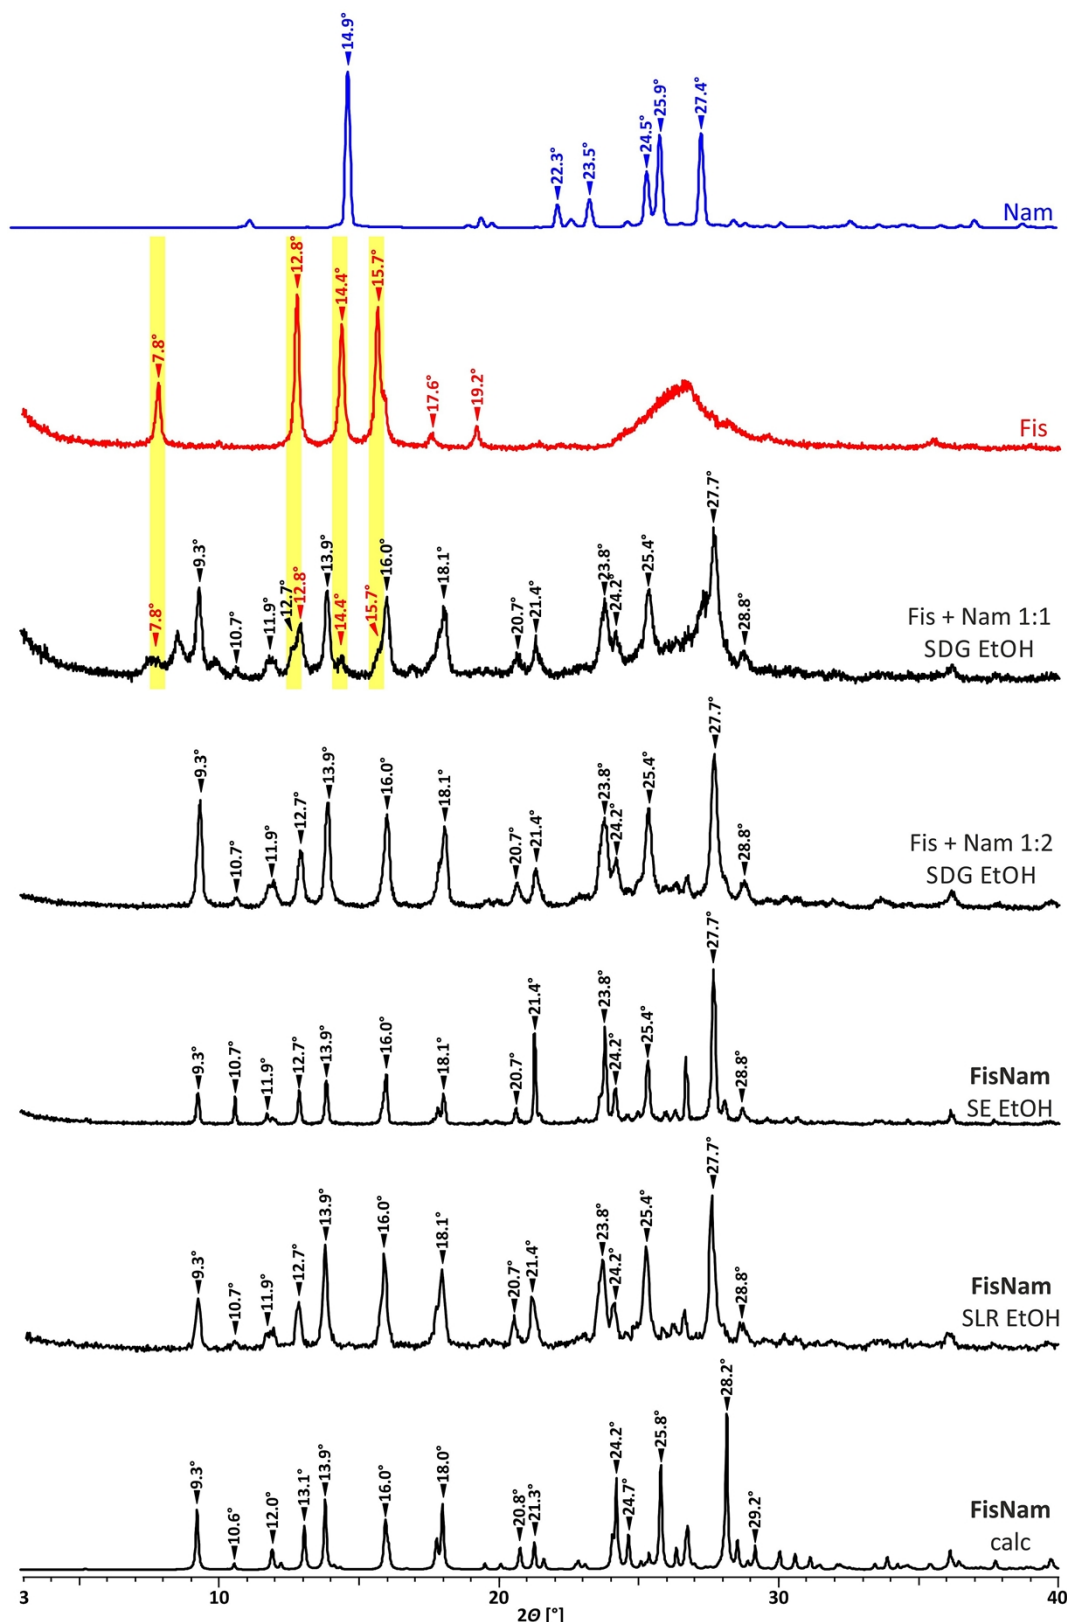

**Fig. S4** XRPD plots of nicotinamide (Nam), fisetin (Fis), products of their co-grinding with addition of ethanol (Fis + Nam 1:1 SDG EtOH; Fis + Nam 1:2 SDG EtOH; note the reflections highlighted in yellow, which indicate presence of unreacted fisetin) and corresponding **FisNam** cocrystal: obtained by slow evaporation of a ethanolic solution (**FisNam** SE EtOH), by slurry technique (**FisNam** SLR Et<sub>2</sub>O+EtOH) and diffractogram calculated from the low-temperature refinement of **FisNam** (**FisNam** calc). Positions of selected reflections are indicated.

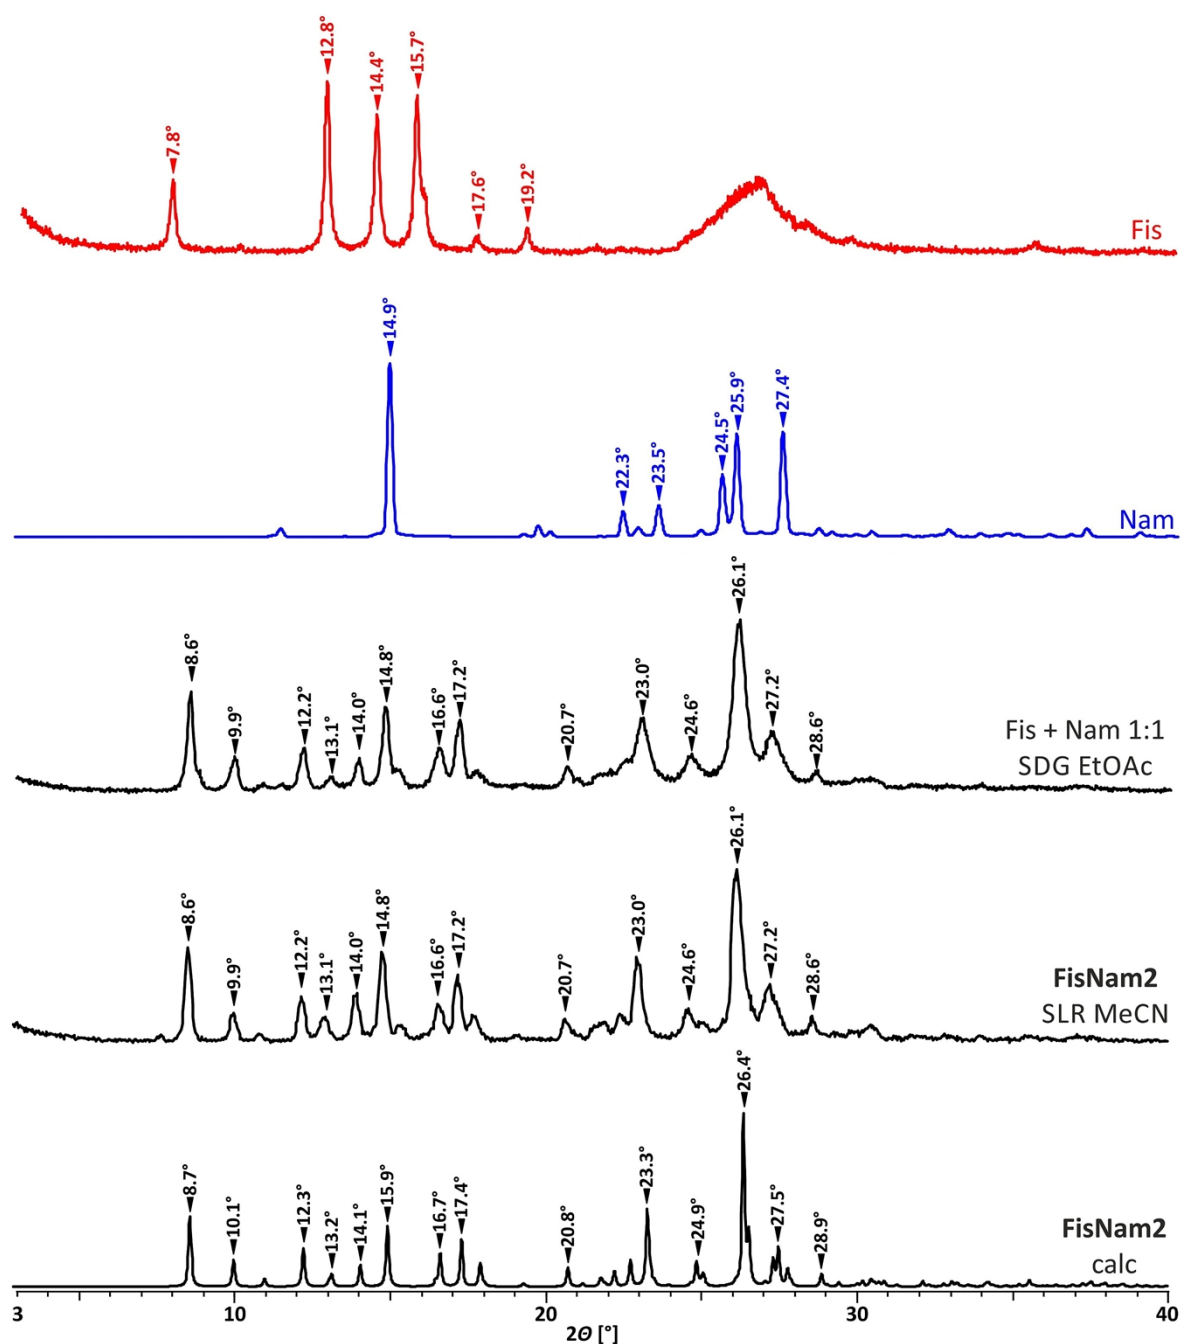

**Fig. S5** XRPD plots of nicotinamide (Nam), fisetin (Fis), products of their co-grinding with addition of ethyl acetate (Fis + Nam 1:1 SDG EtOAc) and corresponding **FisNam2** cocrystal: obtained by slurry technique (**FisNam2** SLR MeCN) and diffractogram calculated from the low-temperature refinement of **FisNam2** (**FisNam2** calc). Positions of selected reflections are indicated.

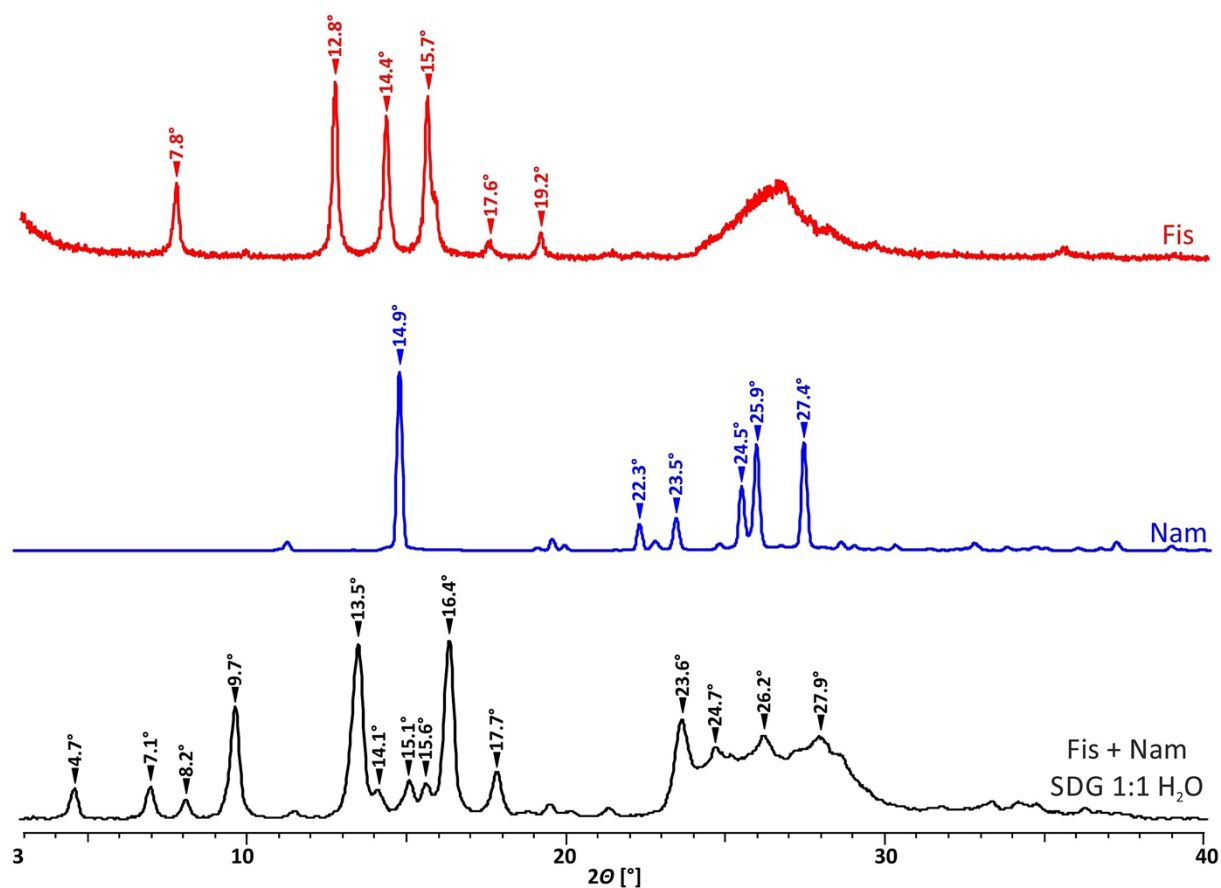

**Fig. S6** XRPD plots of fisetin (Fis), nicotinamide (Nam) and product of their co-grinding with addition of water (Fis + Nam 1:1 SDG H<sub>2</sub>O). Positions of selected reflections are indicated.

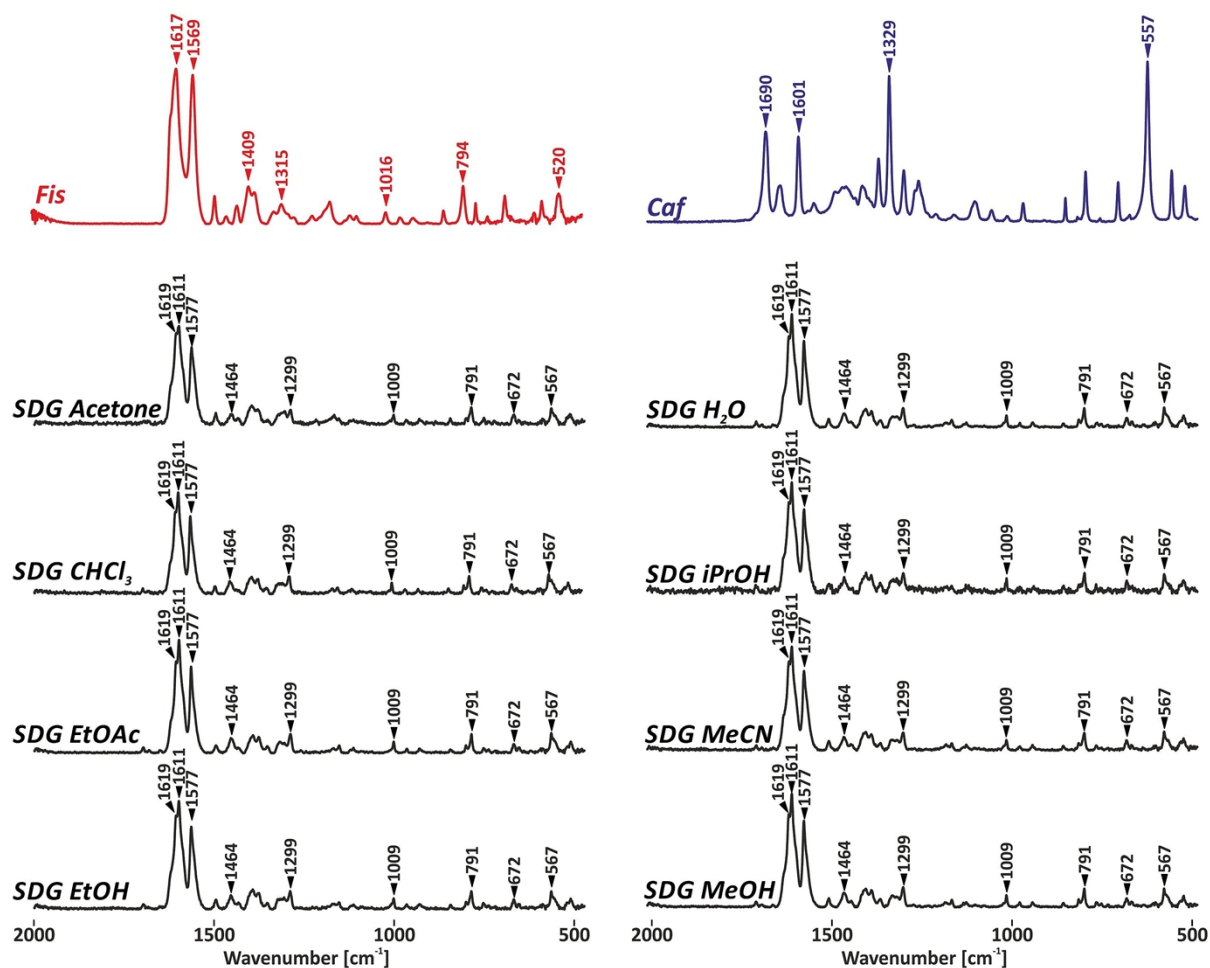

**Fig. S7** FT-Raman spectra of fisetin (Fis), caffeine (Caf) and products of their co-grinding with addition of a solvent (SDG). Selected vibrational bands are indicated.



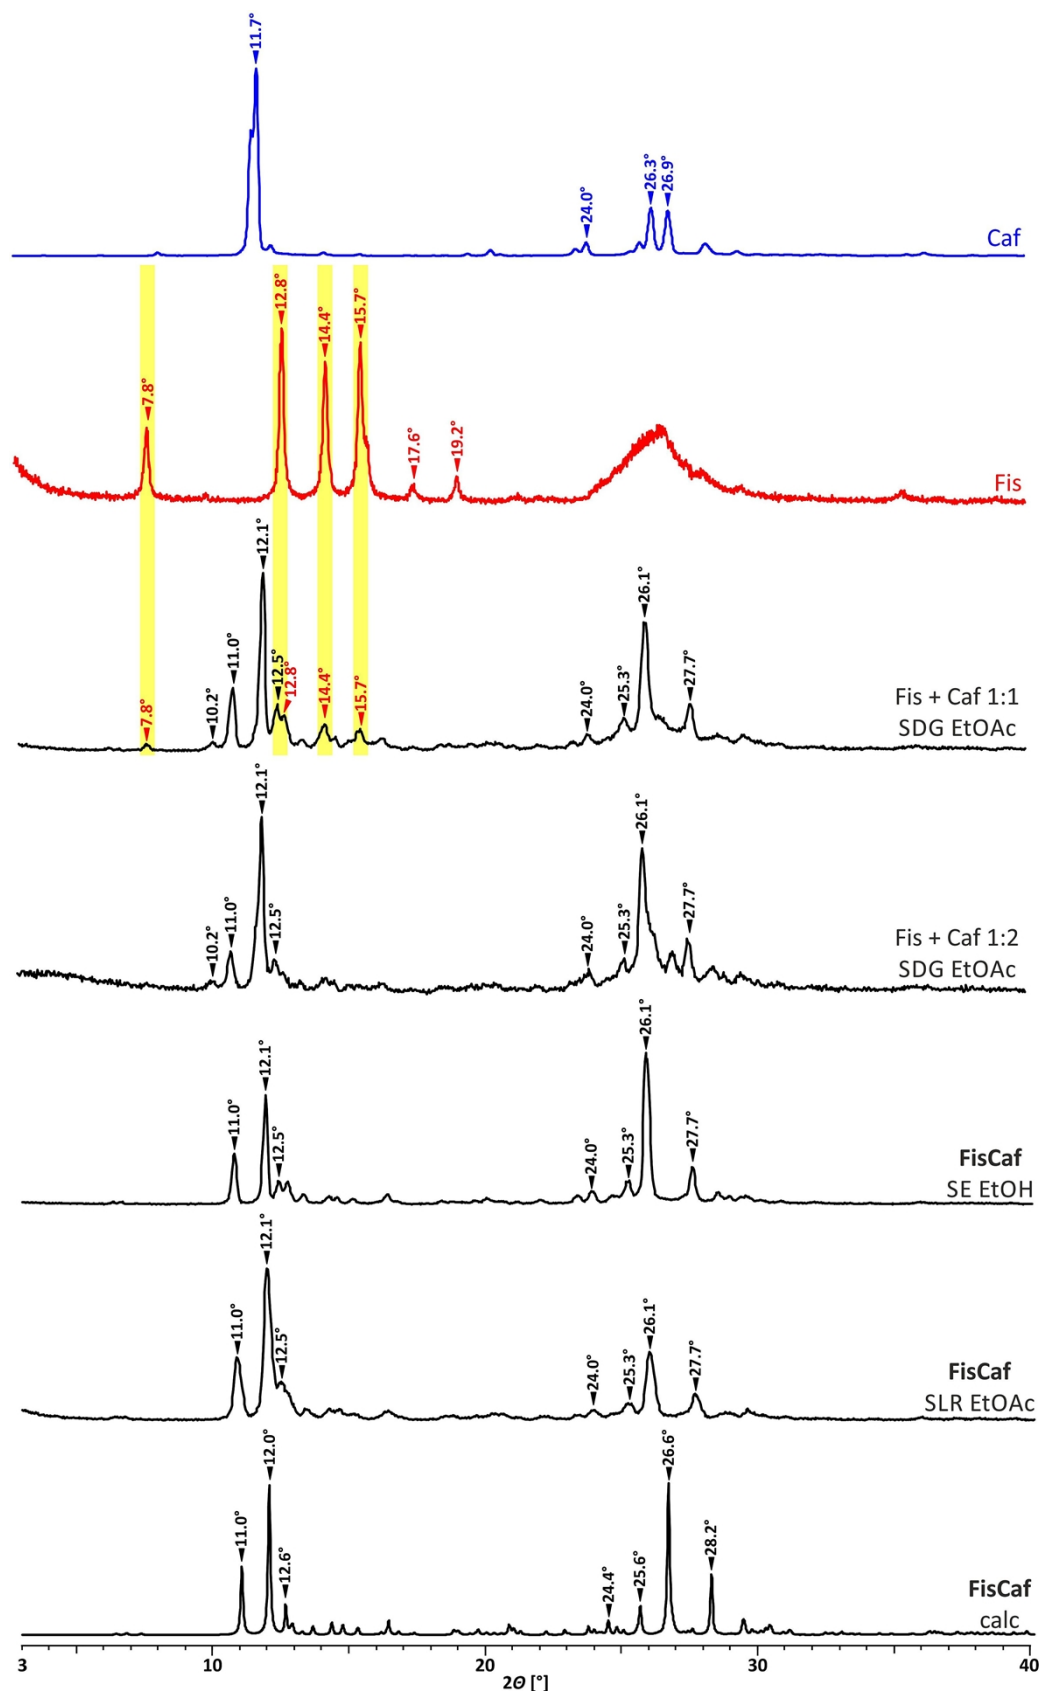

**Fig. S8** XRPD plots of caffeine (Caf), fisetin (Fis), products of their co-grinding with addition of ethyl acetate (Fis + Caf 1:1 SDG EtOAc; Fis + Caf 1:2 SDG EtOAc; note the reflections highlighted in yellow, which indicate presence of unreacted fisetin) and corresponding **FisCaf** cocrystal: obtained by slow evaporation of a ethanolic solution (**FisCaf** SE EtOH), by slurry technique (**FisCaf** SLR EtOAc) and diffractogram calculated from the low-temperature refinement of **FisCaf** (**FisCaf** calc). Positions of selected reflections are indicated.

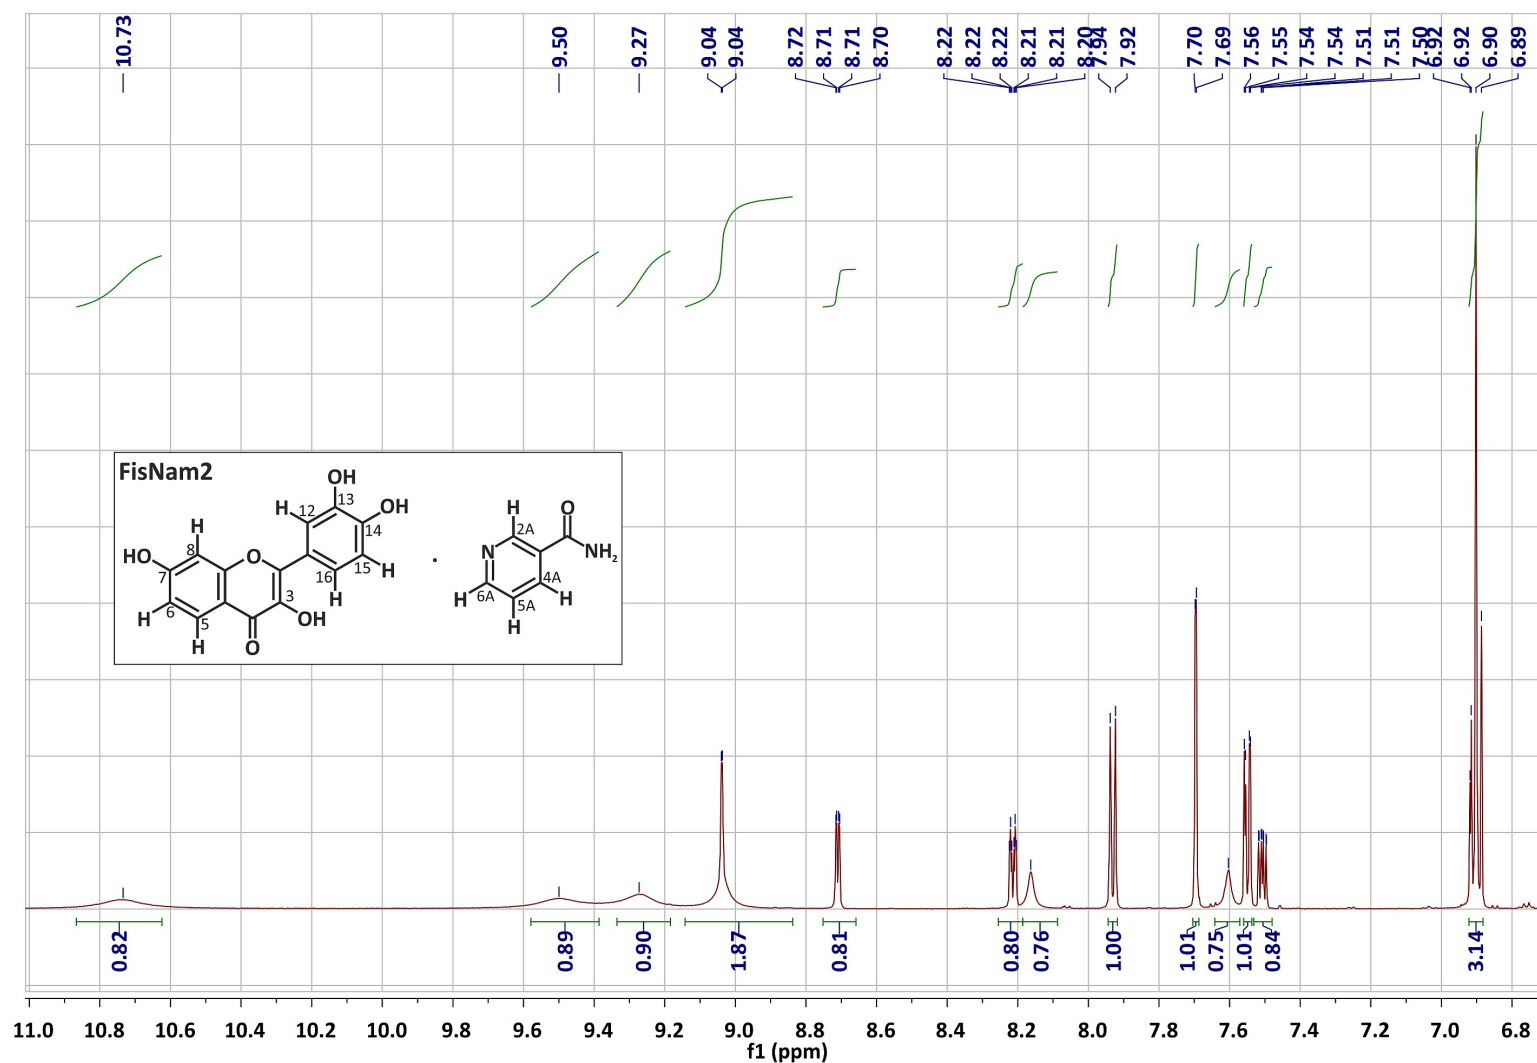

<sup>1</sup>H NMR, ppm (DMSO-*d*<sub>6</sub>, 600MHz, 25°C, TMS): 10.73 (s, 1H, OH-7), 9.50 (s, 1H, OH-14), 9.27 (s, 1H, OH-13), 9.04 (s, 1H, OH-3), 9.03 (d, *J* = 1.7 Hz, 1H, H-2A), 8.71 (dd, *J* = 4.8, 2.0 Hz, 1H, H-6A), 8.21 (ddd, *J* = 7.9, 2.0, 1.7 Hz, 1H, H-4A), 8.16 (s, 1H, NH<sub>2</sub>), 7.93 (d, *J* = 9.1 Hz, 1H, H-5), 7.70 (d, *J* = 2.2 Hz, 1H, H-12), 7.56 (dd, *J* = 8.4, 2.2 Hz, 1H, H-16), 7.51 (dd, *J* = 7.9, 4.8 Hz, 1H, H-5A), 6.90 (d, *J* = 9.1 Hz, 1H, H-6), 6.89 (s, 1H, H-8).

**Fig. S9** <sup>1</sup>H NMR spectrum and assignments for the **FisNam2** cocrystal dissolved in DMSO-*d*<sub>6</sub>.

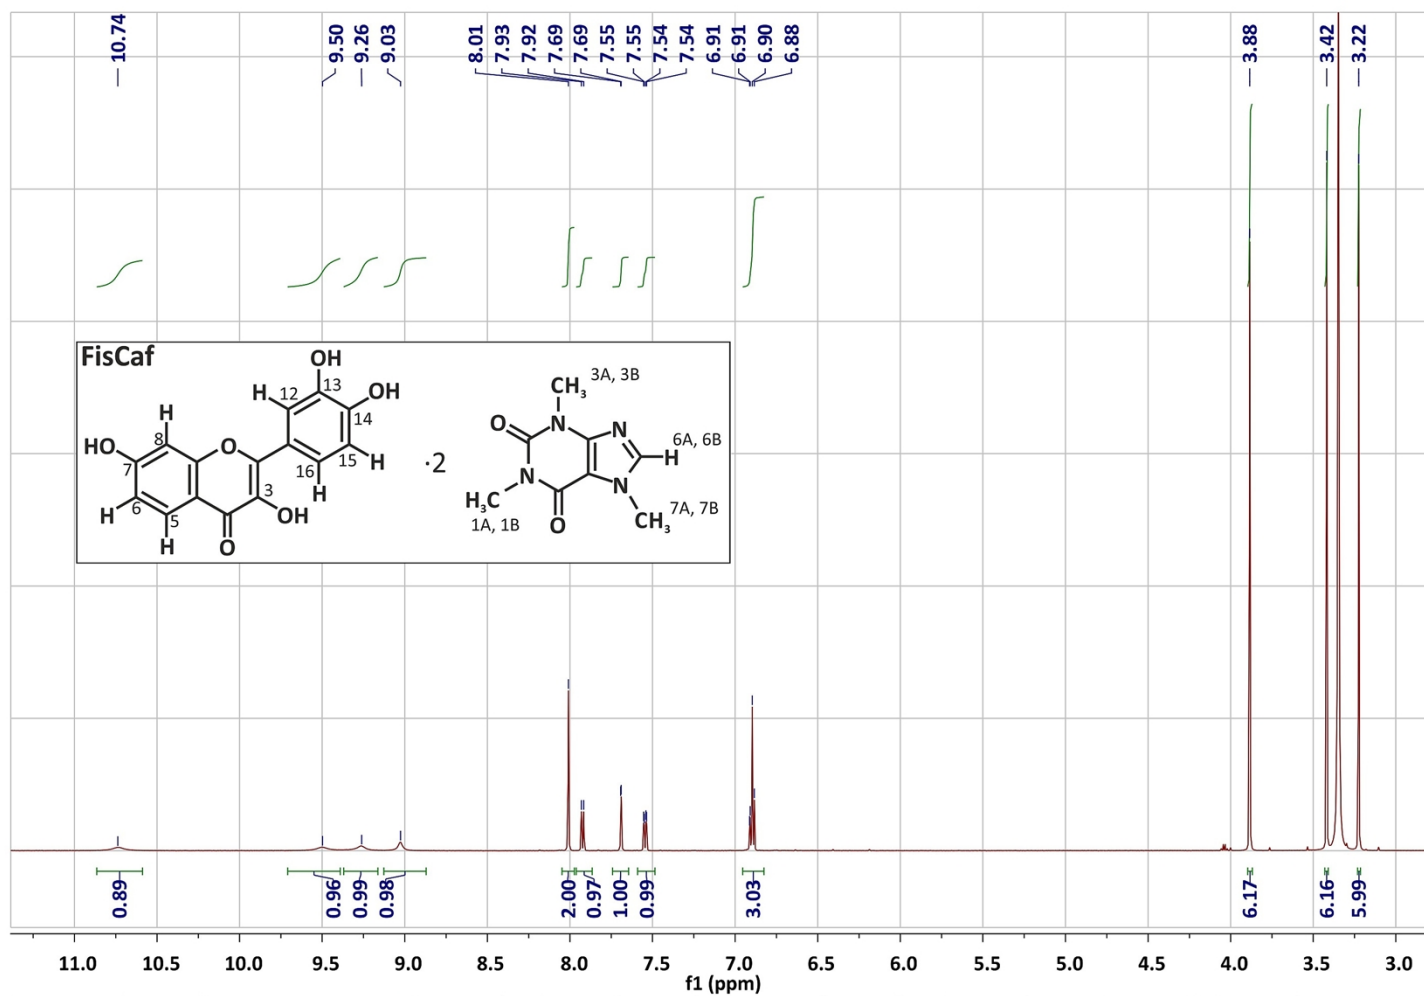

<sup>1</sup>H NMR, ppm (DMSO-*d*<sub>6</sub>, 600MHz, 25°C, TMS): 10.74 (s, 1H, OH-7), 9.50 (s, 1H, OH-14), 9.26 (s, 1H, OH-13), 9.03 (s, 1H, OH-3), 8.01 (s, 2H, H6A, H6B), 7.92 (d, *J* = 8.3 Hz, 1H, H-5), 7.69 (d, *J* = 2.1 Hz, 1H, H-12), 7.55 (dd, *J* = 8.5, 2.1 Hz, 1H, H-16), 6.90 (d, *J* = 8.3 Hz, 1H, H-6), 6.89 (d, *J* = 8.5 Hz, 1H, H-15), 6.89 (s, 1H, H-8), 3.88 (s, 6H, CH<sub>3</sub>-N7A, CH<sub>3</sub>-N7B), 3.42 (s, 6H, CH<sub>3</sub>-N1A, CH<sub>3</sub>-N1B), 3.22 (s, 6H, CH<sub>3</sub>-N3A, CH<sub>3</sub>-N3B).

**Fig. S10** <sup>1</sup>H NMR spectrum and assignments for the **FisCaf** cocrystal dissolved in DMSO-*d*<sub>6</sub>.

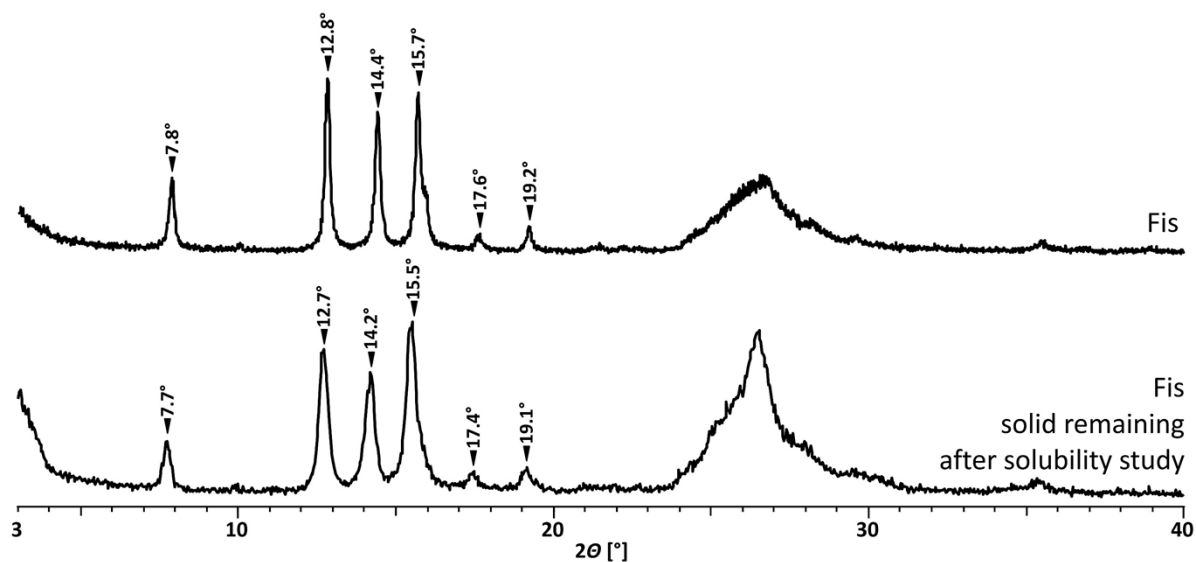

**Fig. S11** XRPD plots of starting (anhydrous) fisetin and the solid phase remaining after its solubility study.

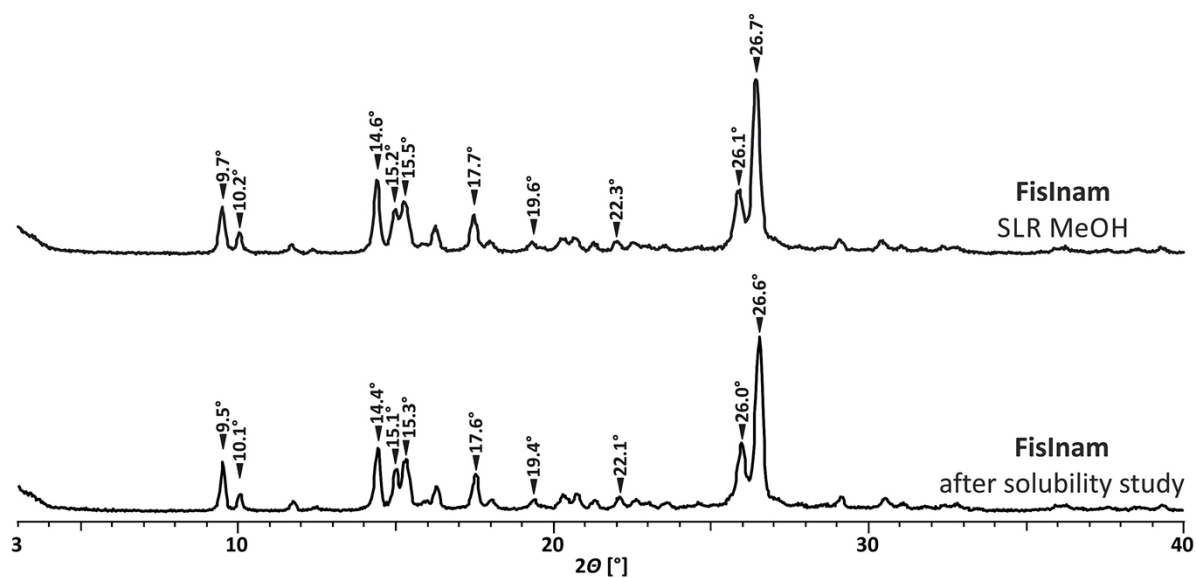

**Fig. S12** XRPD plots of the **FisInam** cocrystal and the solid phase remaining after its solubility study.

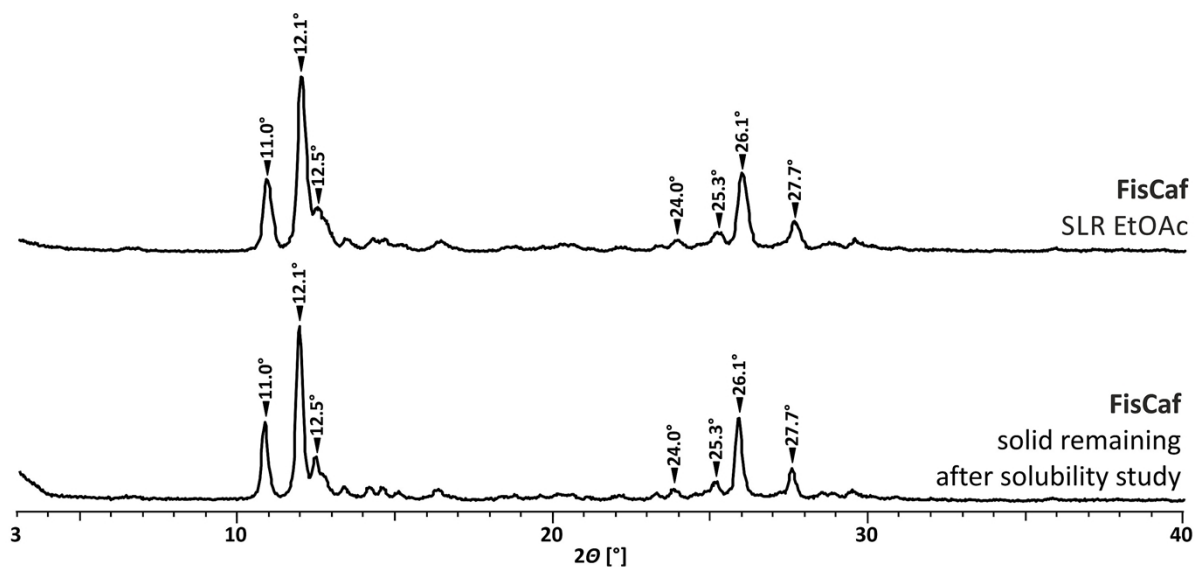

**Fig. S13** XRPD plots of the **FisCaf** cocrystal and the solid phase remaining after its solubility study.

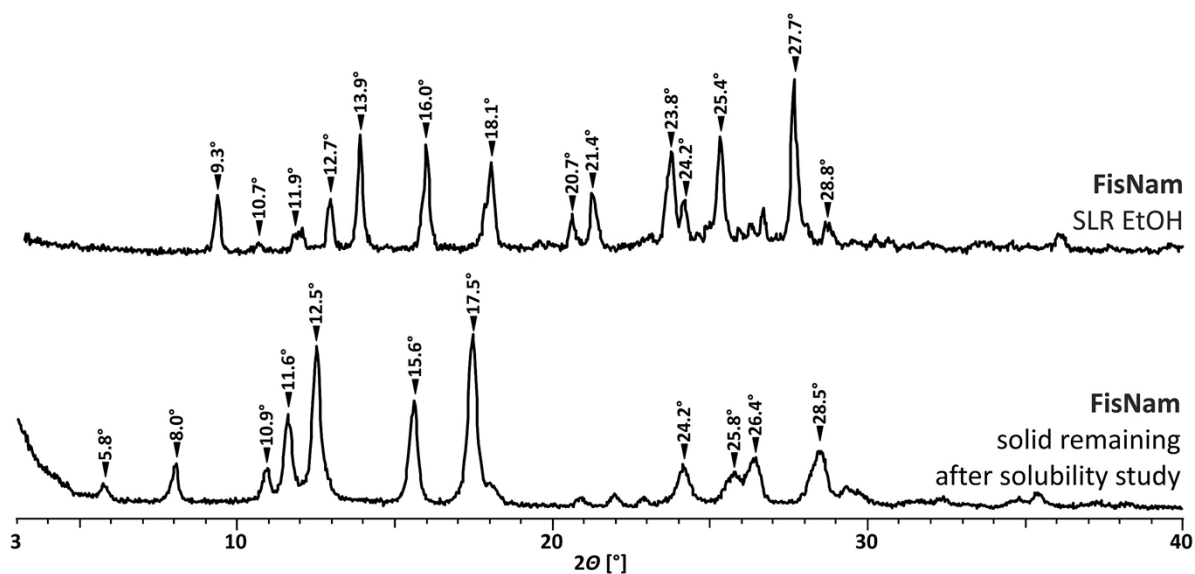

**Fig. S14** XRPD plots of the **FisNam** cocrystal and the solid phase remaining after its solubility study (fisetin hydrate).

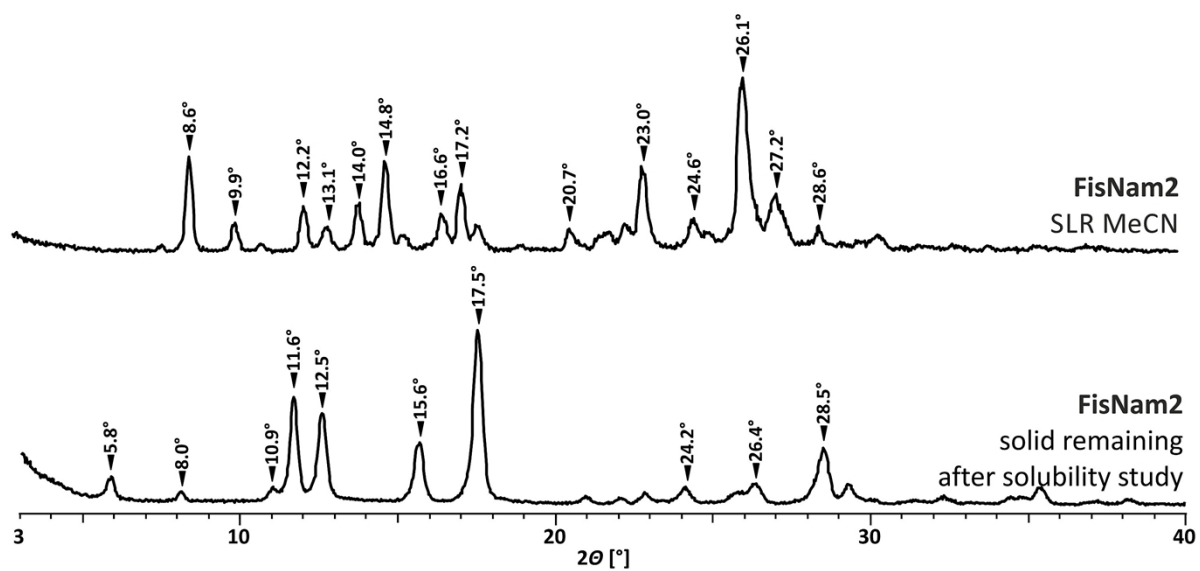

**Fig. S15** XRPD plots of the **FisNam** cocrystal and the solid phase remaining after its solubility study (fisetin hydrate).

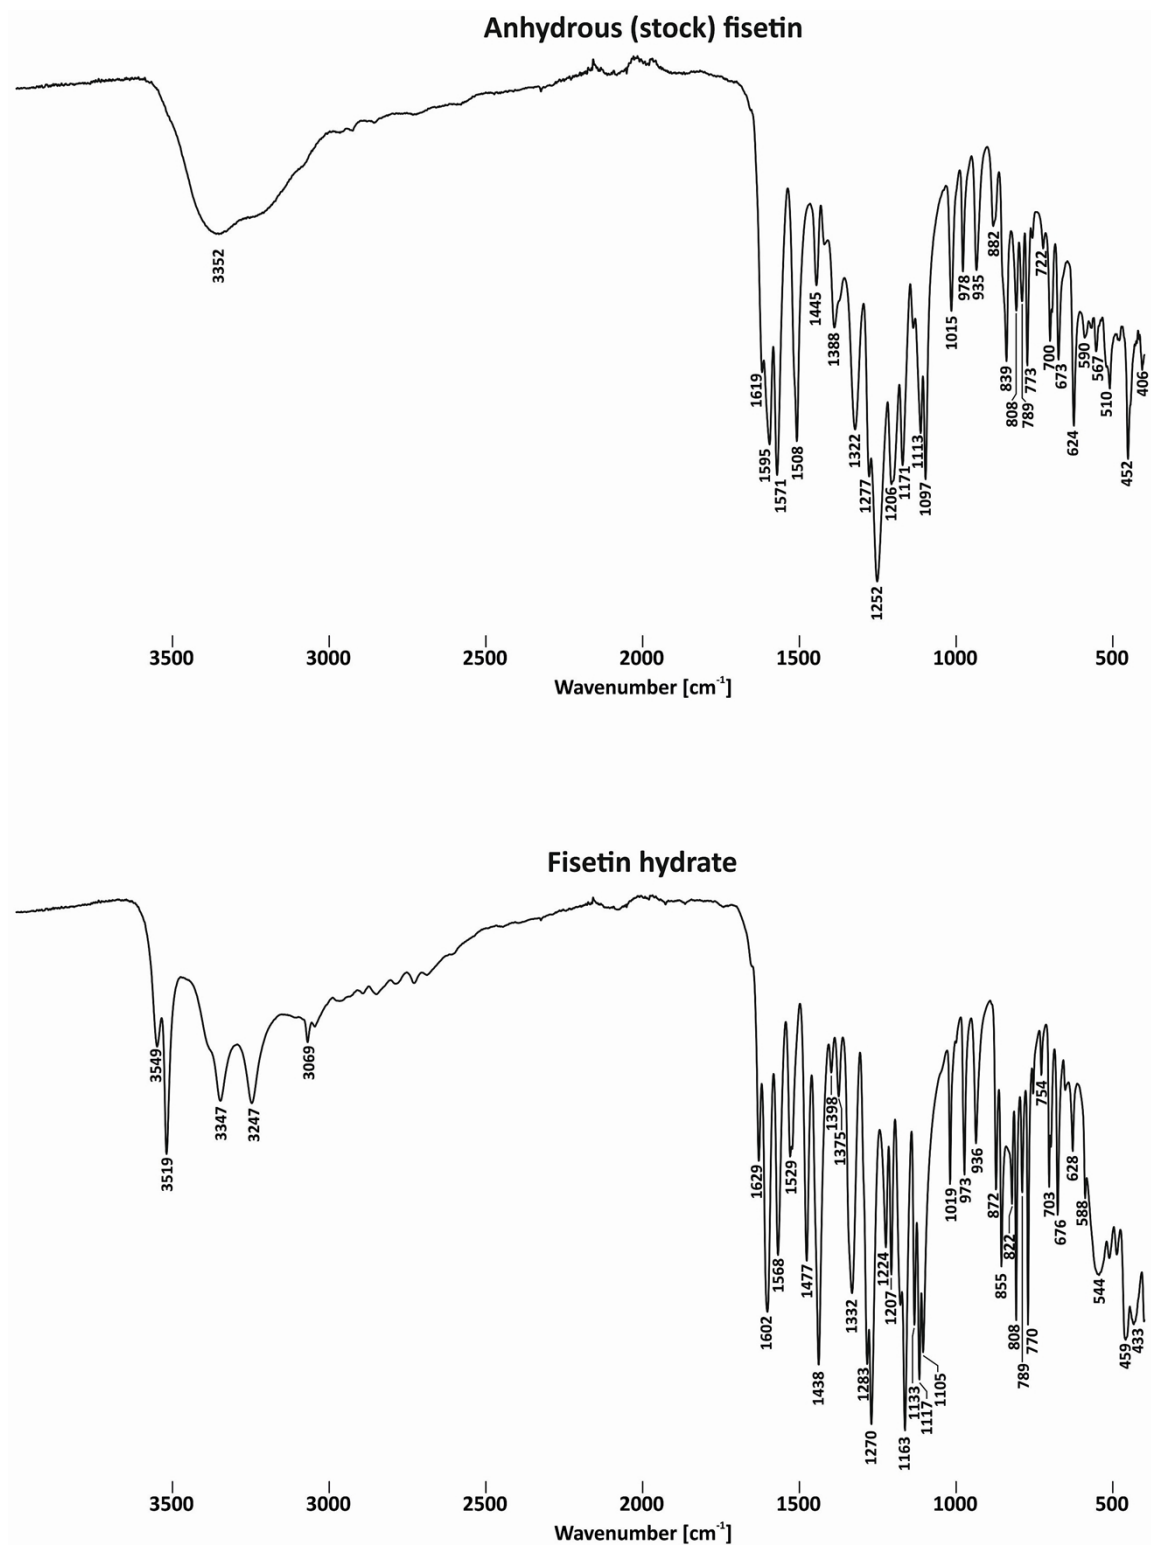

**Fig. S16** FT-IR spectra of anhydrous (stock) fisetin (upper) and fisetin hydrate (lower). Selected vibrational bands are indicated.

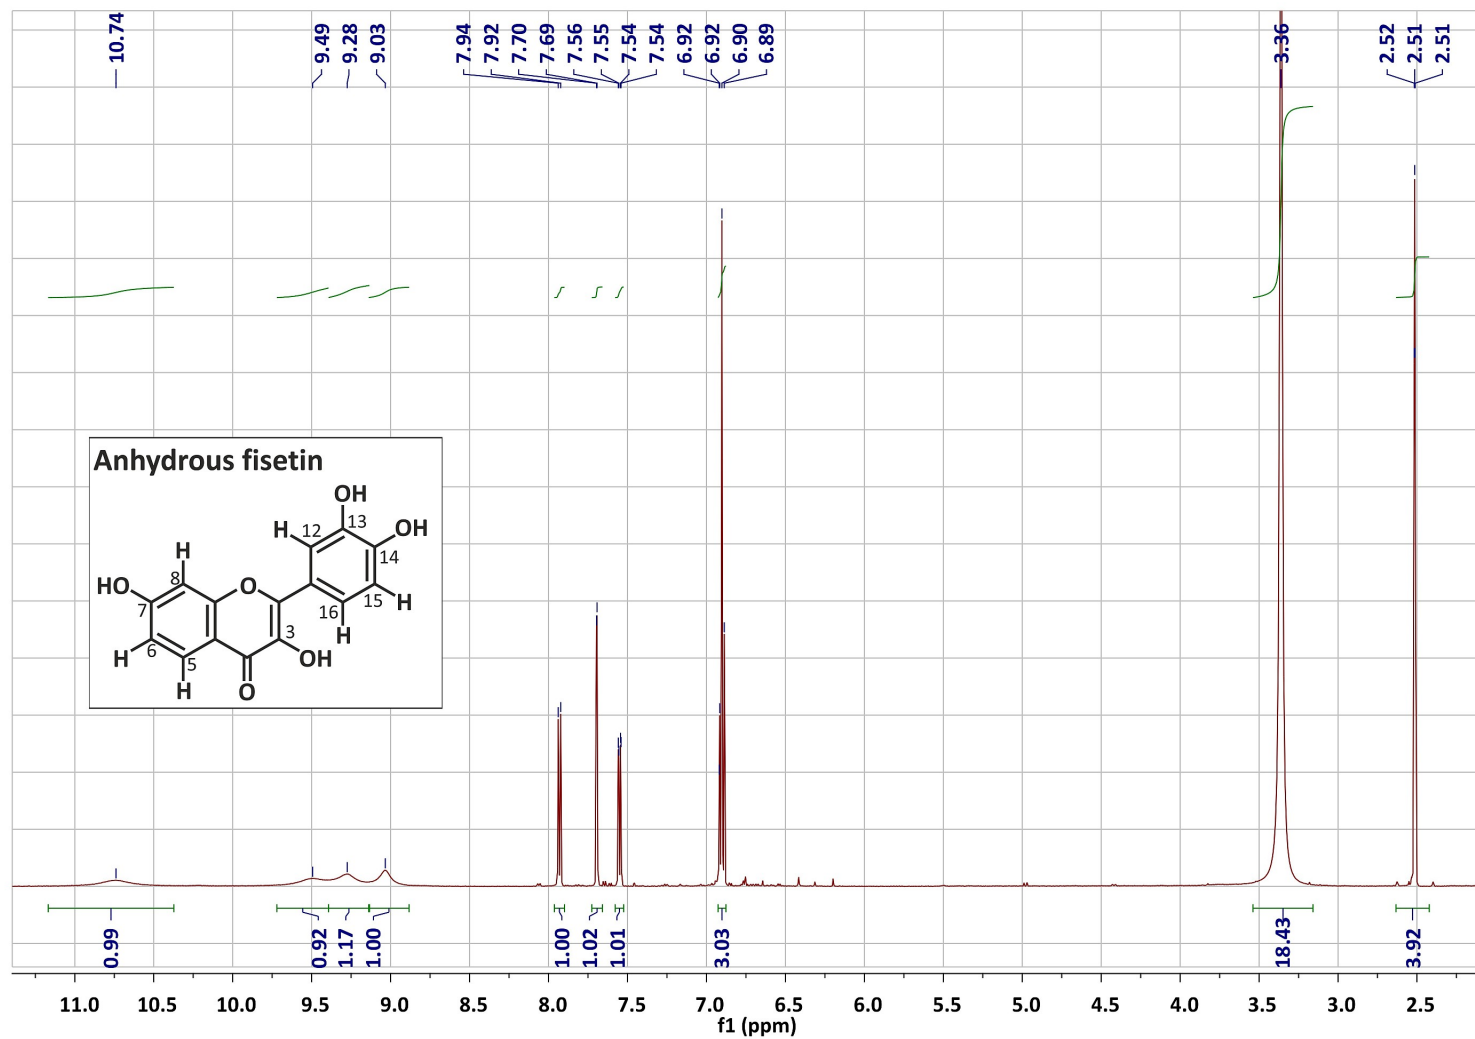

$^1\text{H}$  NMR, ppm ( $\text{DMSO}-d_6$ , 600MHz, 25°C, TMS): 10.74 (s, 1H, OH-7), 9.49 (s, 1H, OH-14), 9.28 (s, 1H, OH-13), 9.03 (s, 1H, OH-3), 7.93 (d,  $J = 9.3$  Hz, 1H, H-5), 7.69 (d,  $J = 2.1$  Hz, 1H, H-12), 7.55 (dd,  $J = 8.4, 2.1$  Hz, 1H, H-16), 6.91 (d,  $J = 9.3$  Hz, 1H, H-6), 6.90 (d,  $J = 8.4$  Hz, 1H, H-15), 6.89 (s, 1H, H-8).

**Fig. S17**  $^1\text{H}$  NMR spectrum and assignments for anhydrous (stock) fisetin dissolved in  $\text{DMSO}-d_6$ .



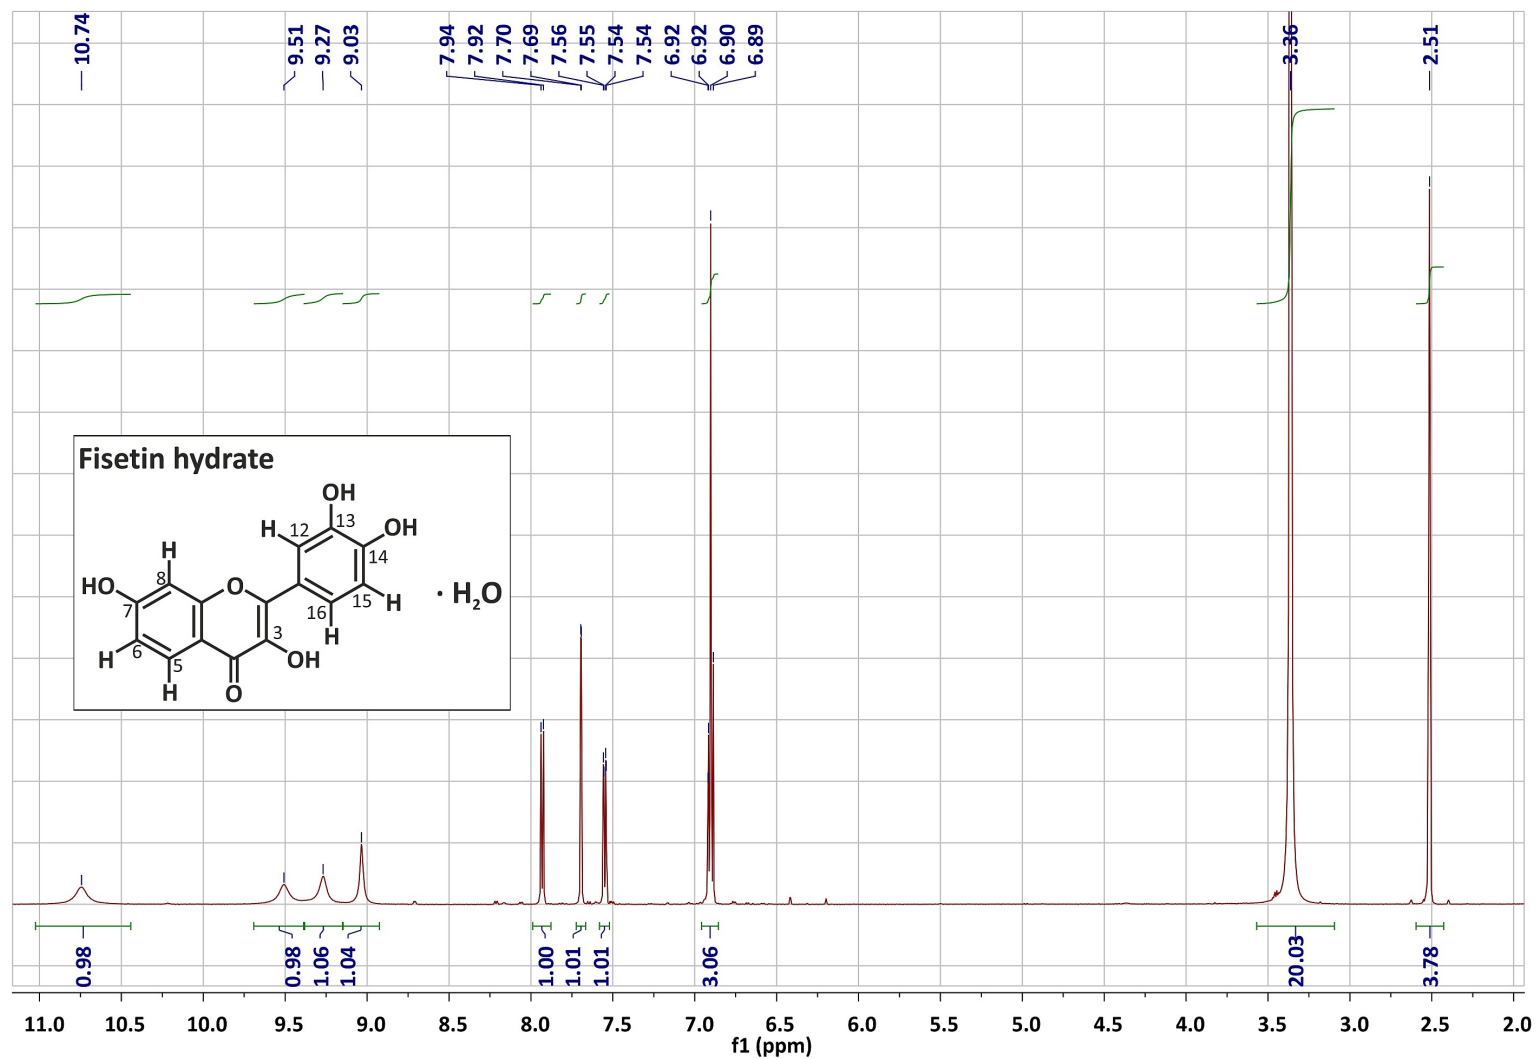

$^1\text{H}$  NMR, ppm ( $\text{DMSO}-d_6$ , 600MHz, 25°C, TMS): 10.74 (s, 1H, OH-7), 9.51 (s, 1H, OH-14), 9.27 (s, 1H, OH-13), 9.03 (s, 1H, OH-3), 7.93 (d,  $J = 9.2$  Hz, 1H, H-5), 7.69 (d,  $J = 2.0$  Hz, 1H, H-12), 7.55 (dd,  $J = 8.5, 2.0$  Hz, 1H, H-16), 6.91 (d,  $J = 9.2$  Hz, 1H, H-6), 6.90 (d,  $J = 8.5$  Hz, 1H, H-15), 6.89 (s, 1H, H-8).

**Fig. S18**  $^1\text{H}$  NMR spectrum and assignments for fisetin hydrate dissolved in  $\text{DMSO}-d_6$ .

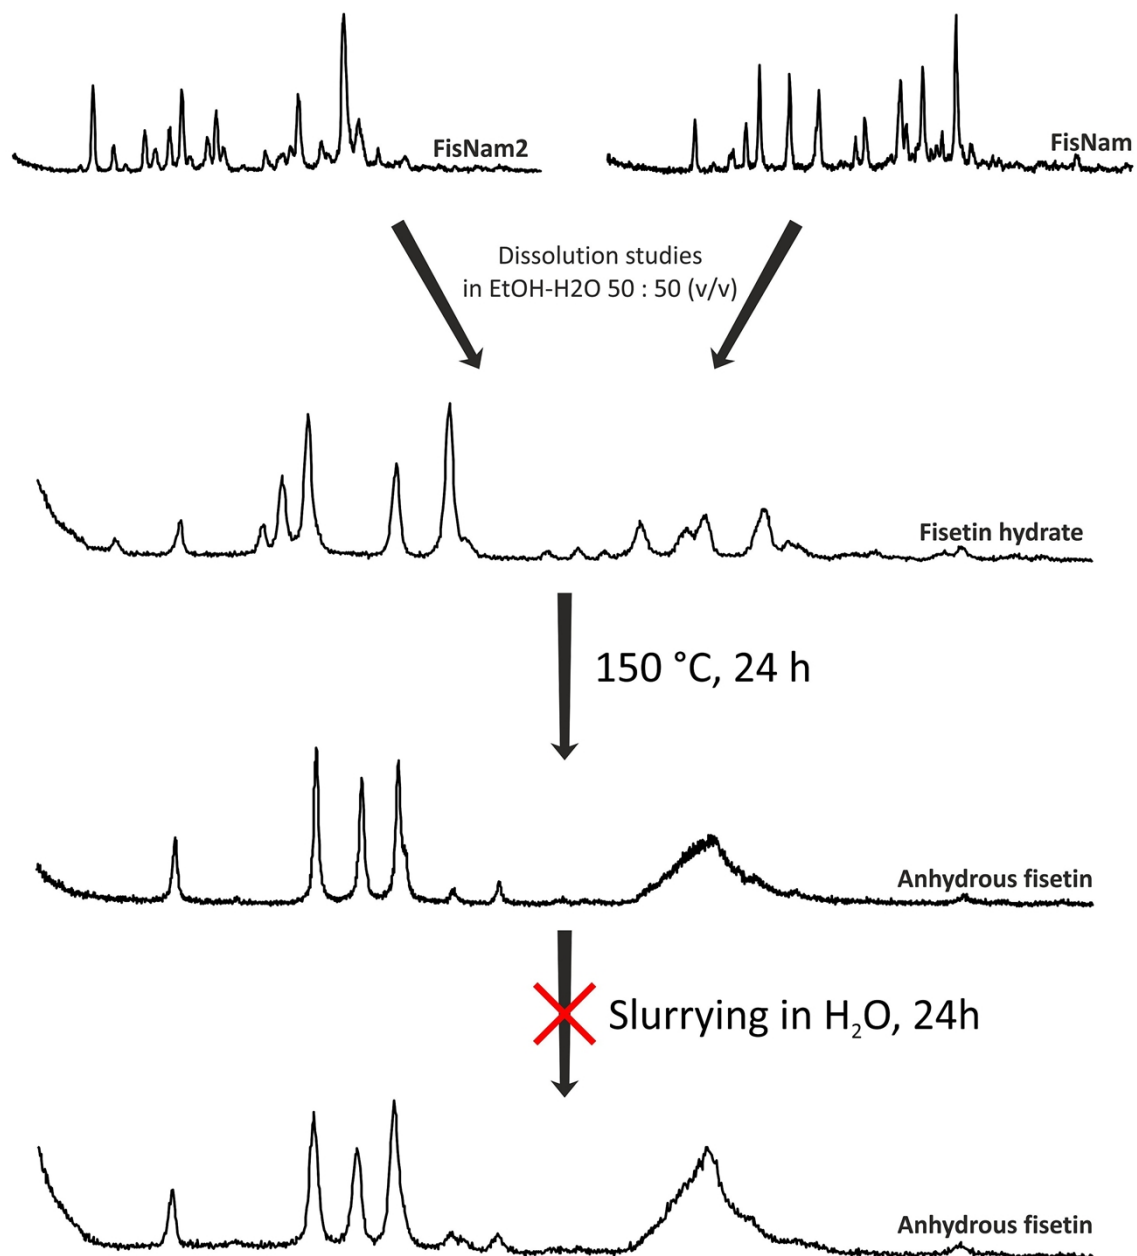

**Fig. S19** Inter-conversion routes between anhydrous fisetin and fisetin hydrate.
